# Supplementary material for: Two-dimensional 67Zn HYSCORE spectroscopy reveals that a Zn-bacteriochlorophyll aP′ dimer is the primary donor (P840) in the type-1 reaction centers of Chloracidobacterium thermophilum
Source: Royal Society of Chemistry journal article supplement (doi:10.1039/c9cp06556c), 2020-01-01
Supplement: c9cp06556c7.pdf [file c9cp06556c7.pdf]

# Two-dimensional $^{67}\text{Zn}$ HYSCORE spectroscopy reveals that a Zn-Bacteriochlorophyll $a_P'$ dimer is the primary donor ( $P_{840}$ ) in the Type-1 reaction centers of *Chloracidobacterium thermophilum*

Philip Charles,<sup>a,‡</sup> Vidmantas Kalendra,<sup>a,‡</sup> Zhihui He,<sup>b,†</sup> Mohammad Hassan Khatami,<sup>d,†</sup> John H. Golbeck,<sup>b,c</sup> Art van der Est,<sup>d,\*</sup>  
K. V. Lakshmi<sup>a,\*</sup> and Donald A. Bryant<sup>b,\*</sup>

<sup>a</sup>Departments of Chemistry and Physics and The Baruch '60 Center for Biochemical Solar Energy Research, Rensselaer Polytechnic Institute, Troy, NY 12180

<sup>b</sup>Department of Biochemistry and Molecular Biology and <sup>c</sup>Department of Chemistry, The Pennsylvania State University, State College, PA 16802

<sup>d</sup>Department of Chemistry, Brock University, St. Catharines, ON, Canada, L2S 3A1

## SUPPLEMENTARY INFORMATION

### Table of contents:

|                                                                                                                                                                 |   |
|-----------------------------------------------------------------------------------------------------------------------------------------------------------------|---|
| 1- Continuous-wave and pulsed EPR spectra of $\text{Zn}^{2+}$ -protoporphyrin IX and <i>C. thermophilum</i> membranes                                           | 2 |
| 2- Electron charge density distribution in the $P_{800}^+$ and $\text{Zn}^{2+}$ -protoporphyrin IX cation                                                       | 3 |
| 3- Experimental and calculated hyperfine and quadrupolar parameters of the $\text{Zn}^{2+}$ -protoporphyrin IX and dimeric $\text{Zn}^{2+}$ -BChl $g_F'$ cation | 4 |

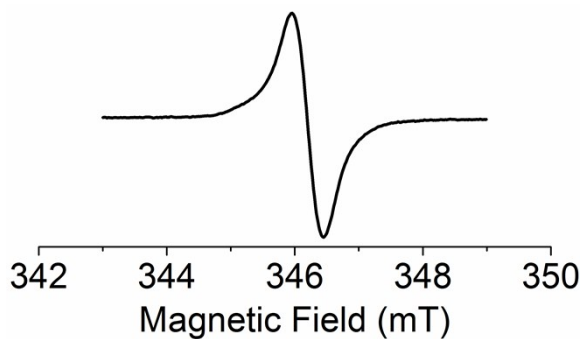

**Figure 1S.** Continuous-wave EPR spectrum of the  $\text{Zn}^{2+}$ -protoporphyrin IX cation at 50 K. The spectrum displays a signal at  $g = 2.003$ . The cationic species was generated by cryogenic white light illumination of a 6 mM  $\text{Zn}^{2+}$ -protoporphyrin IX using ACN as a solvent.

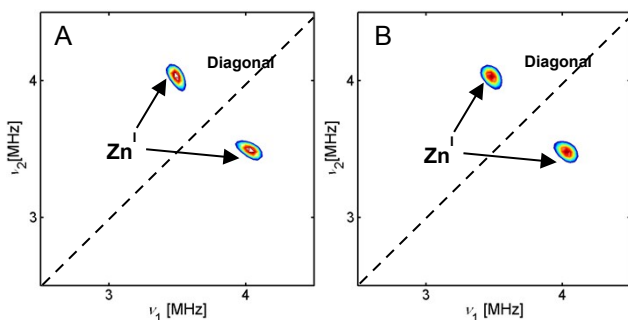

**Figure 2S.** (A) Experimental and (B) simulated 2D  $^{67}\text{Zn}$  HYSCORE spectrum of the  $\text{Zn}^{2+}$ -protoporphyrin IX cation at 5 K. The spectrum displays a pair of cross-peaks that are symmetric about the main diagonal that arise from the magnetic interaction of  $^{67}\text{Zn}$  (nuclear spin,  $I = 5/2$ ) with the unpaired electron spin ( $S = 1/2$ ) of the  $\text{Zn}^{2+}$ -protoporphyrin IX cation.

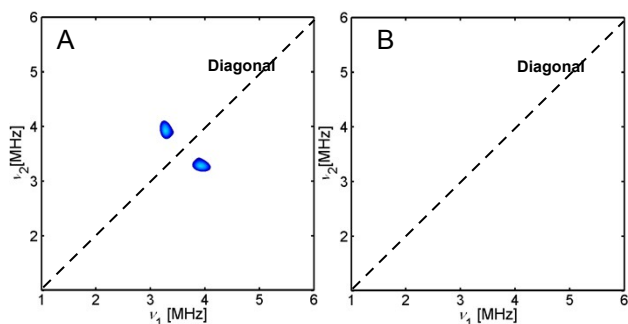

**Figure 3S.** Comparison of the experimental 2D  $^{67}\text{Zn}$  HYSCORE spectrum of (A)  $^{67}\text{Zn}$ -labelled and (B) unlabelled *C. thermophilum* membranes containing RCs. Both of the plots are normalized by the same number of scans on samples with similar concentrations. The cross-peaks from the hyperfine interactions with the  $^{67}\text{Zn}$  atom(s) that are observed in part (A) are a result of the high levels of isotopic enrichment of  $^{67}\text{Zn}$  in the  $^{67}\text{Zn}$ -labelled *C. thermophilum* membranes containing RCs.

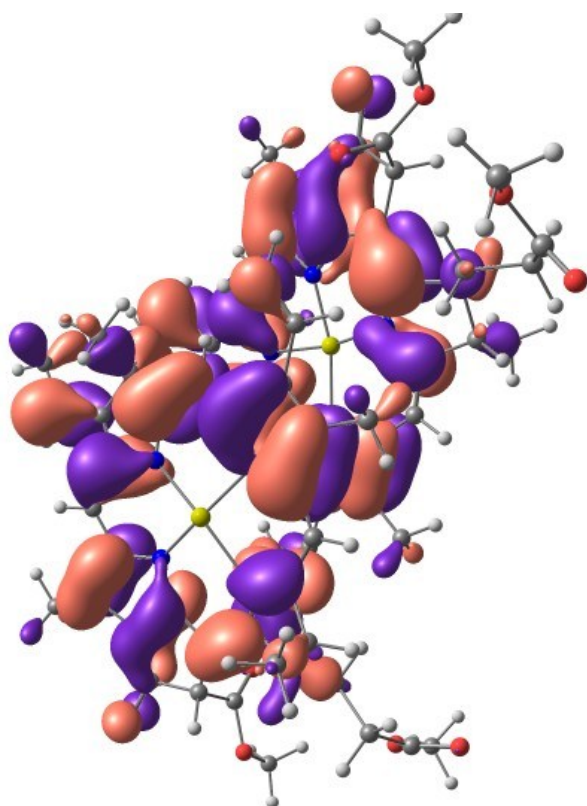

**Figure 4S.** Electron charge density distribution in the singly occupied molecular orbital of the primary donor cation,  $P_{800}^+$ , of the heliobacterial RC that is comprised of a BChl  $g_F$  homodimer. The computational model is derived from the recent high-resolution X-ray crystal structure of the heliobacterial RC.<sup>3</sup>

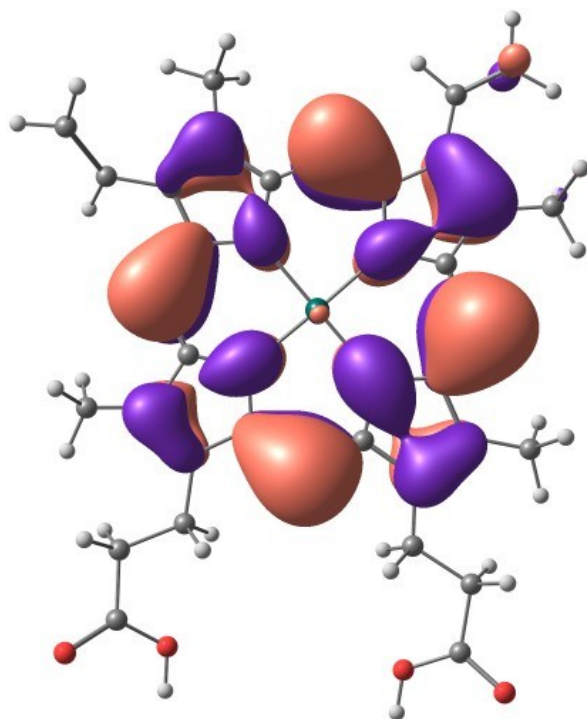

**Table 1S.** Experimental  $^{67}\text{Zn}$  hyperfine (A) and quadrupolar (K) couplings for the  $\text{Zn}^{2+}$ -protoporphyrin IX cation that were obtained from experimental 2D HSCORE measurements.

| Nucleus       | $A_x$<br>(MHz)     | $A_y$<br>(MHz)     | $A_z$<br>(MHz)     | $A_{iso}$<br>(MHz) | K<br>(MHz)         | $\eta$             |
|---------------|--------------------|--------------------|--------------------|--------------------|--------------------|--------------------|
| $\text{Zn}^I$ | 0.77<br>$\pm 0.05$ | 0.84<br>$\pm 0.03$ | 0.88<br>$\pm 0.03$ | 0.83<br>$\pm 0.04$ | 0.80<br>$\pm 0.03$ | 0.23<br>$\pm 0.10$ |

**Table 2S.**  $^{67}\text{Zn}$  hyperfine (A) and quadrupolar (K) couplings for the  $\text{Zn}^{2+}$ -protoporphyrin cation that are obtained from DFT calculations.

| Nucleus       | $A_x$<br>(MHz) | $A_y$<br>(MHz) | $A_z$<br>(MHz) | $A_{iso}$<br>(MHz) | K<br>(MHz) | $\eta$ |
|---------------|----------------|----------------|----------------|--------------------|------------|--------|
| $\text{Zn}^I$ | 0.77           | 0.84           | 0.88           | 0.83               | 1.28       | 0.06   |

**Table 3S.**  $^{67}\text{Zn}$  hyperfine (A) and quadrupolar (K) parameters of the oxidized dimeric  $\text{Zn}^{2+}$ -BChl  $g_F'$  cation that are obtained from DFT calculations.

| Nucleus          | $A_x$<br>(MHz) | $A_y$<br>(MHz) | $A_z$<br>(MHz) | $A_{iso}$<br>(MHz) | K<br>(MHz) | $\eta$ |
|------------------|----------------|----------------|----------------|--------------------|------------|--------|
| $\text{Zn}^I$    | 0.52           | 0.64           | 0.71           | 0.62               | 1.35       | 0.14   |
| $\text{Zn}^{II}$ | 0.49           | 0.61           | 0.68           | 0.59               | 1.35       | 0.14   |
