# Supplementary figures and images for: Two-dimensional 67Zn HYSCORE spectroscopy reveals that a Zn-bacteriochlorophyll aP′ dimer is the primary donor (P840) in the type-1 reaction centers of Chloracidobacterium thermophilum
Source: Royal Society of Chemistry journal article supplement (doi:10.1039/c9cp06556c), 2020-01-01

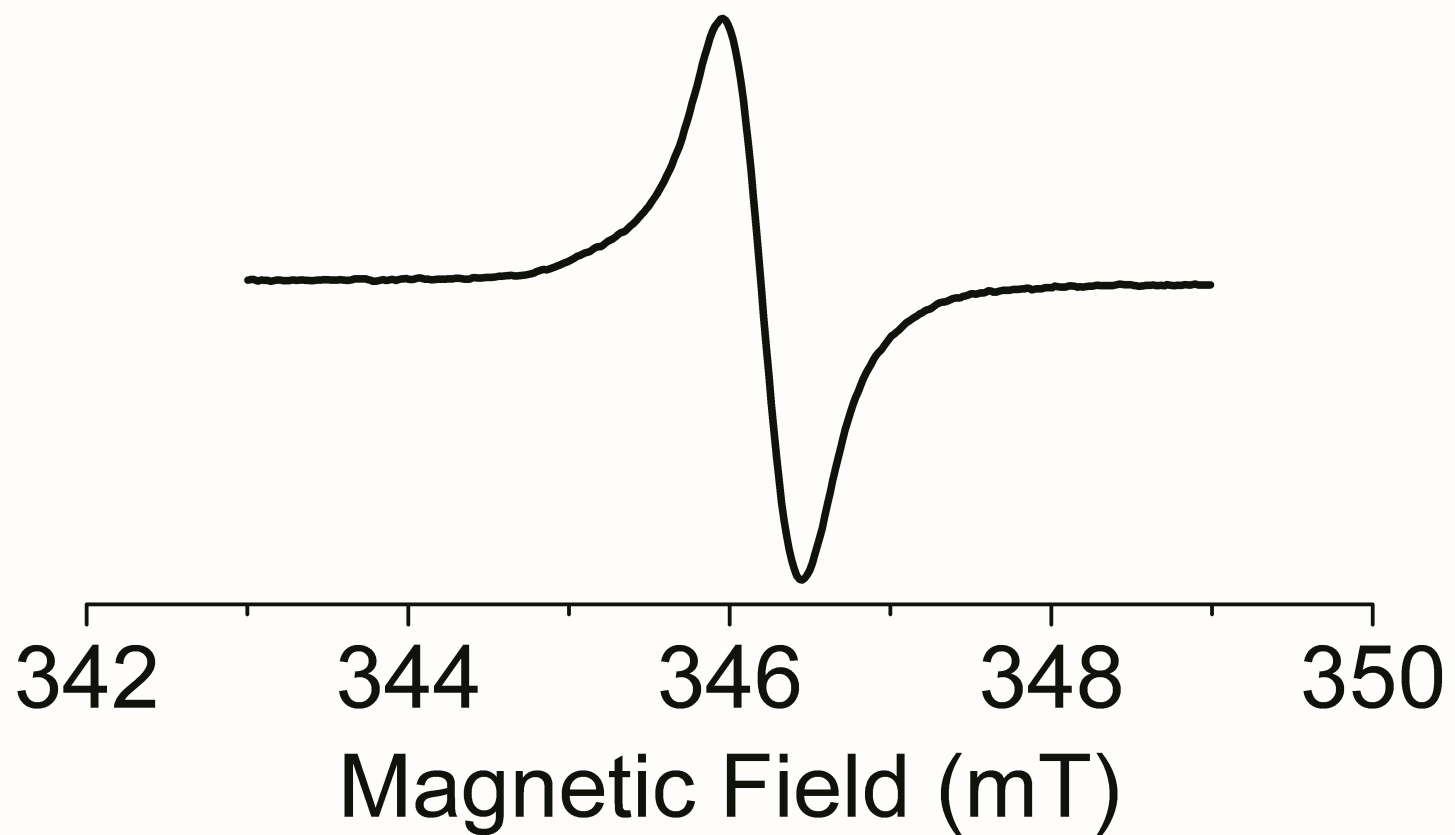

Supplement: c9cp06556c2.pdf [file c9cp06556c2.pdf]

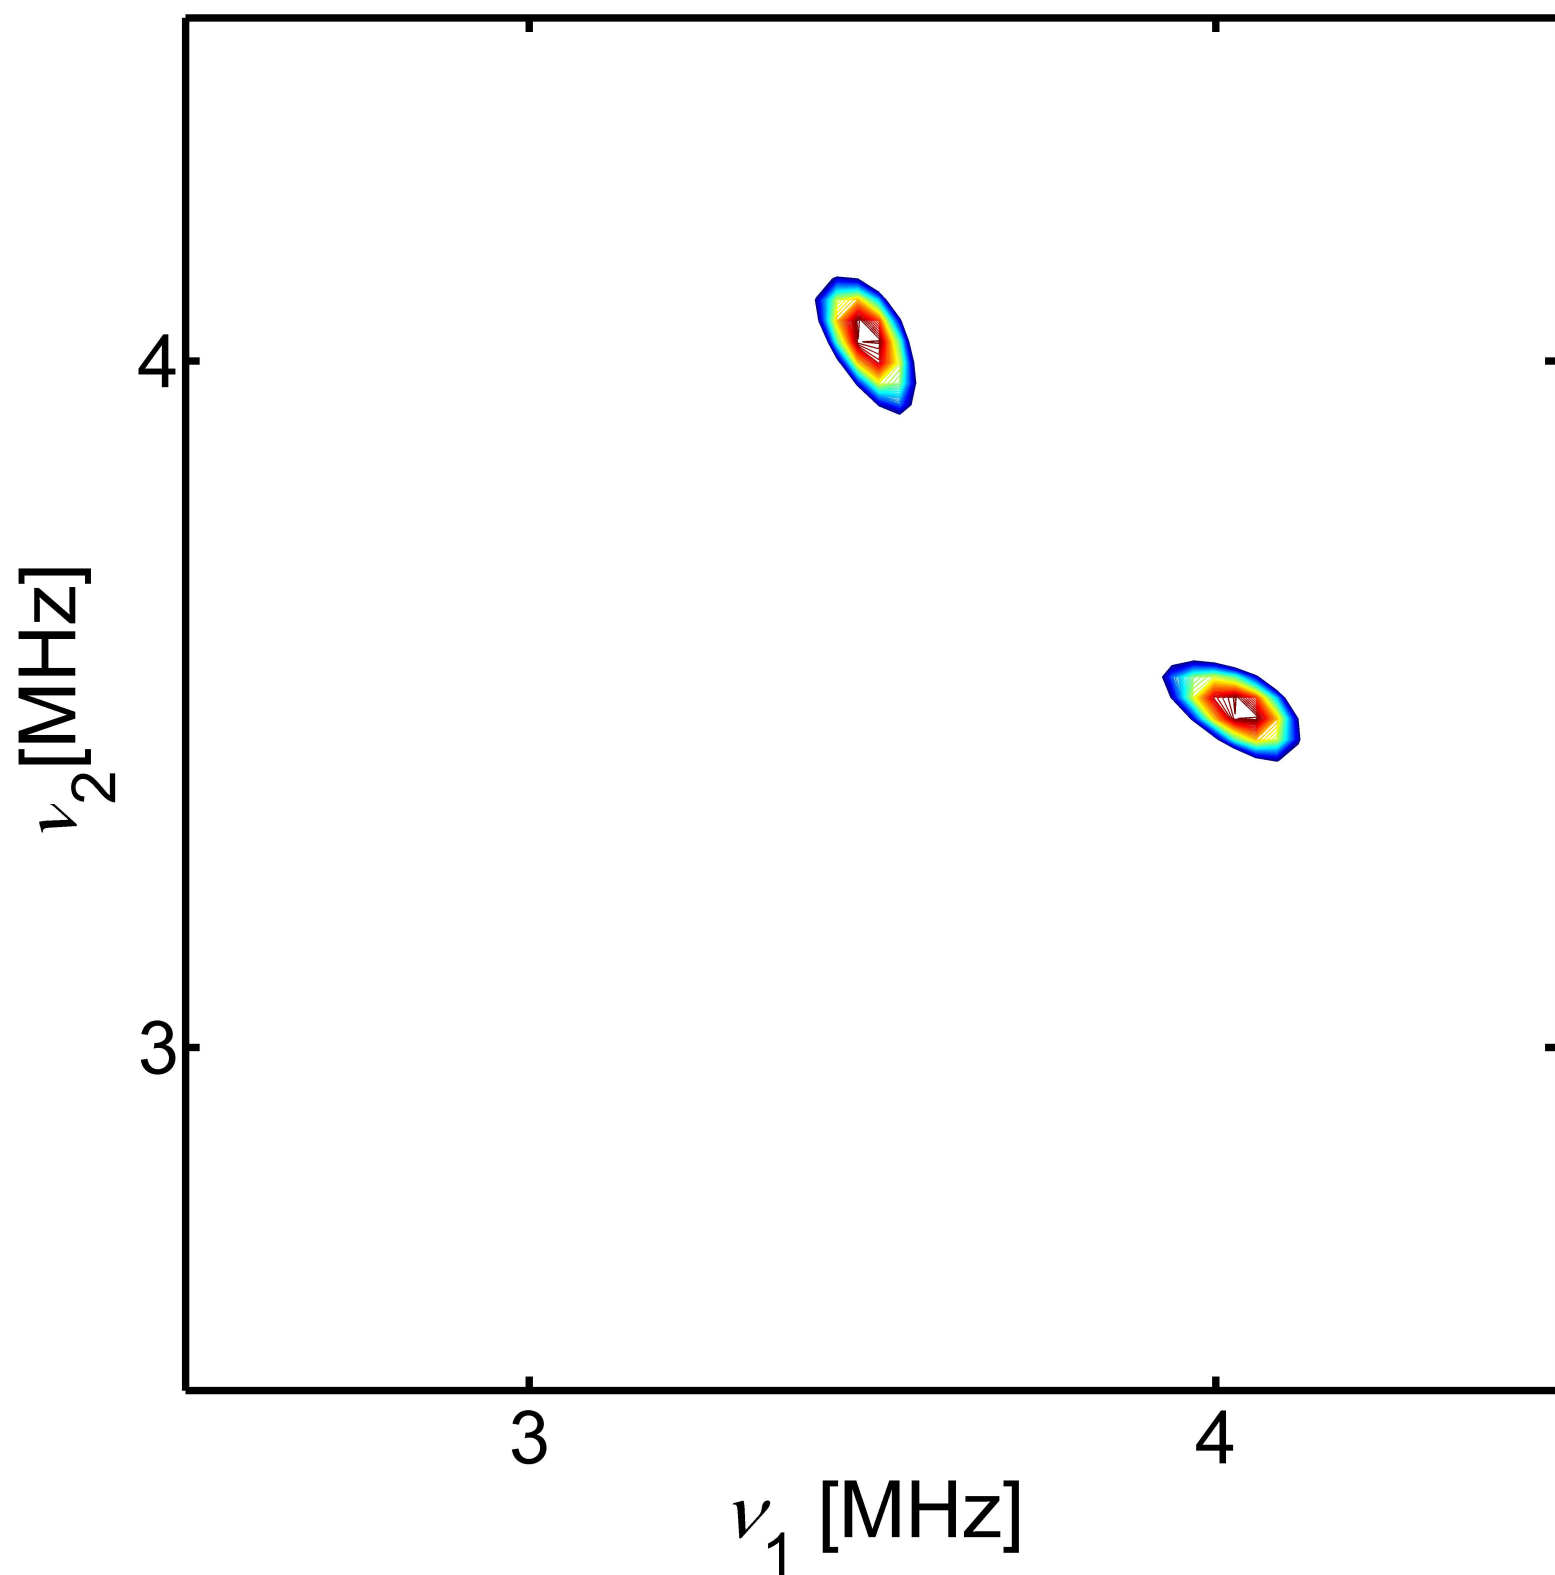

Supplement: c9cp06556c3.pdf [file c9cp06556c3.pdf]

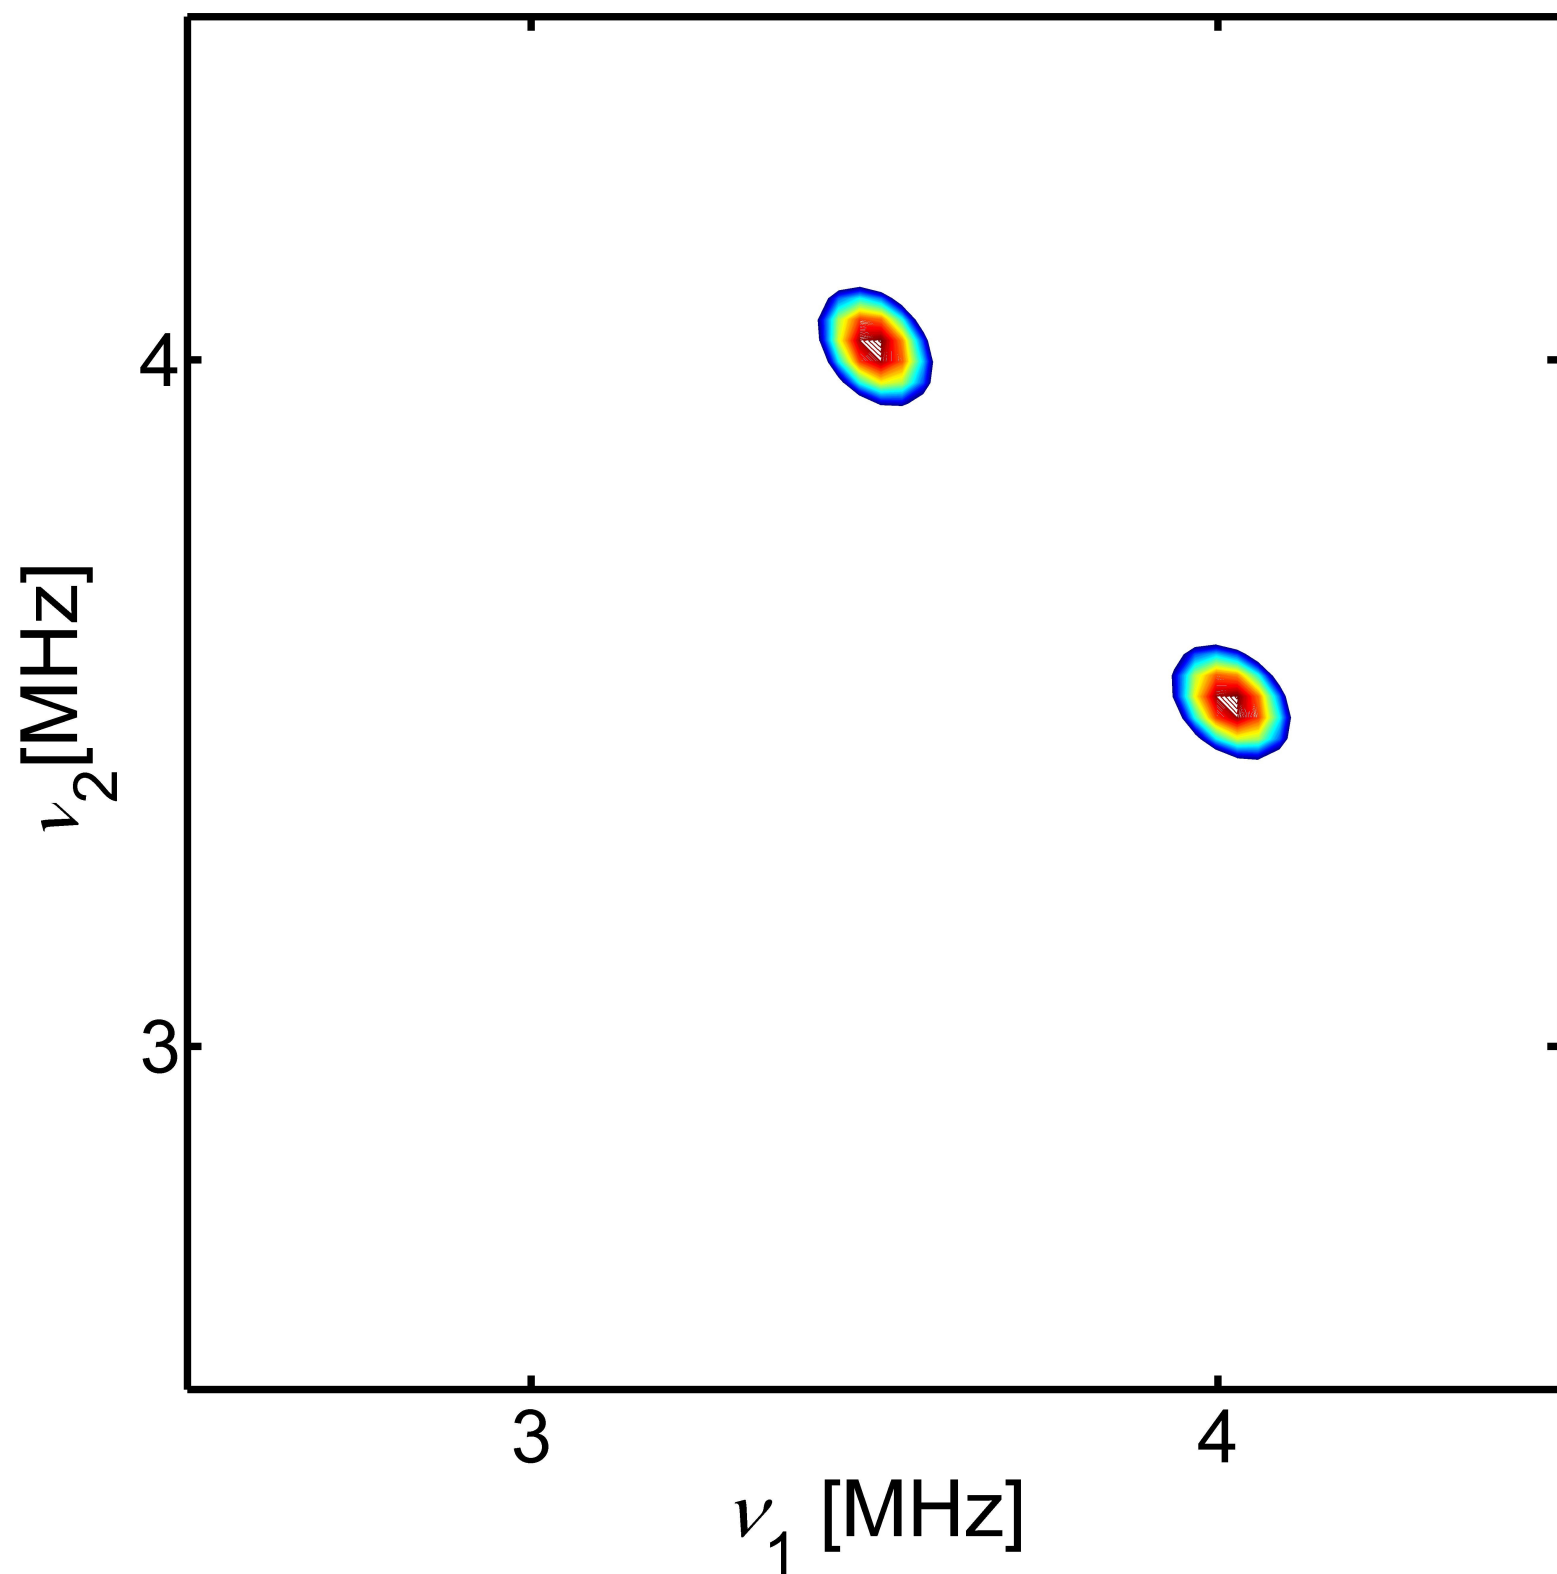

Supplement: c9cp06556c4.pdf [file c9cp06556c4.pdf]

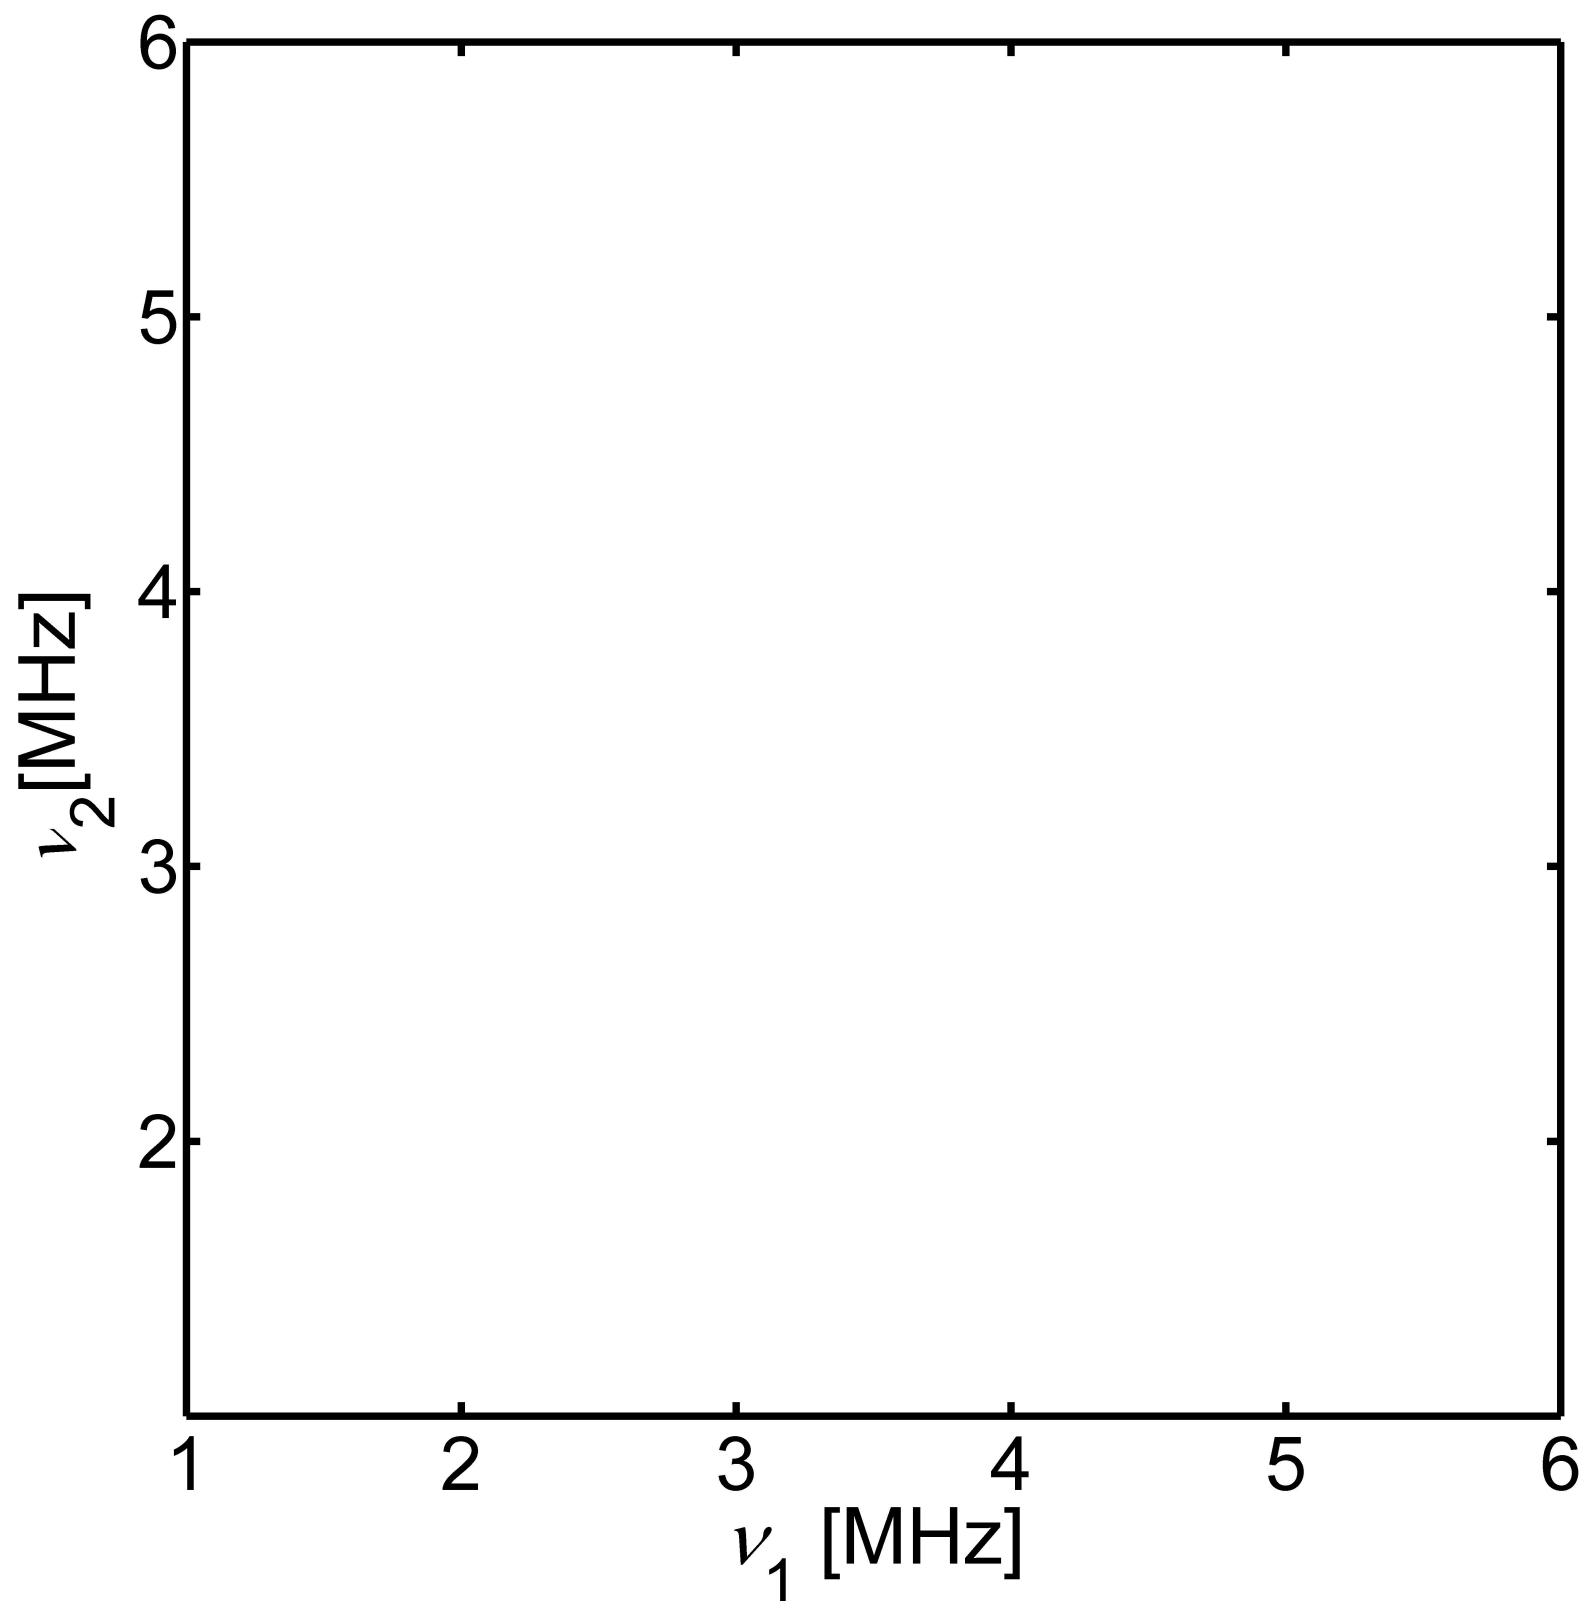

Supplement: c9cp06556c6.pdf [file c9cp06556c6.pdf]
